# Supplementary figures and images for: Genome-wide detection of high abundance N6-methyladenosine sites by microarray
Source: PubMed Central journal article supplement — RNA. 2015 Aug;21(8):1511–8. doi: 10.1261/rna.051474.115 (PMC4509940; doi:10.1261/rna.051474.115), 2015-08

A

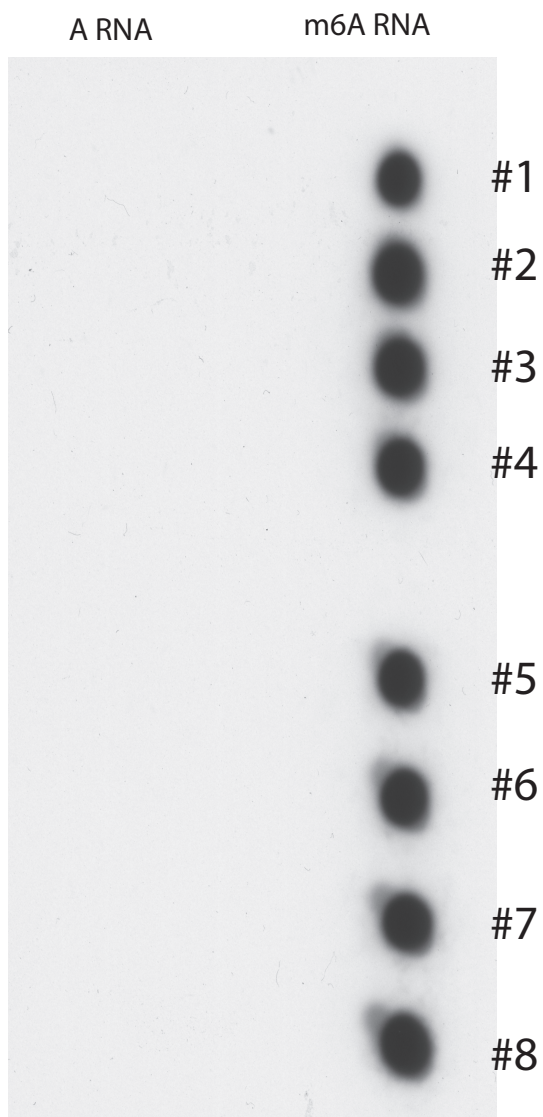

B

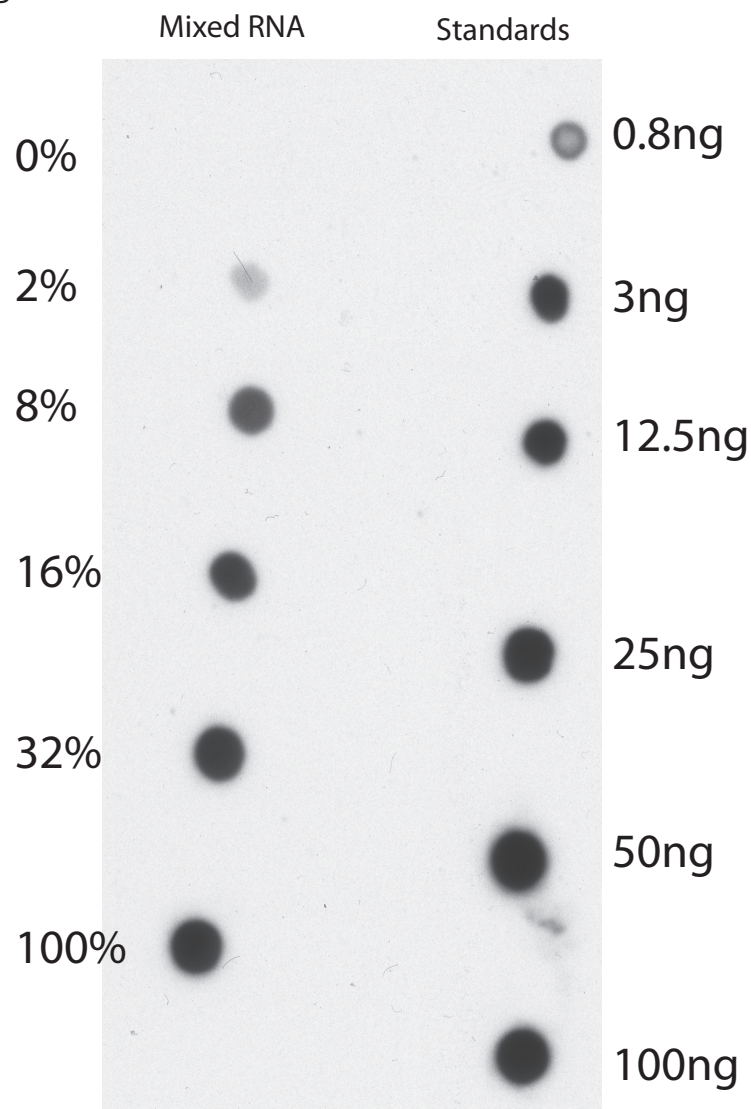

Supplement: supp_051474.115_FigS1.pdf [file supp_051474.115_FigS1.pdf]

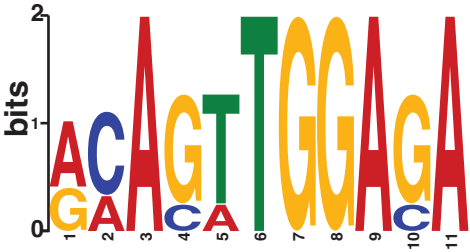

Supplement: supp_051474.115_FigS2.pdf [file supp_051474.115_FigS2.pdf]
